# Supplementary material
Source: PubMed Central journal article supplement (PMC7450136)
Supplement: supp_RA120.014723_161359_1_supp_557757_qcsrbb.pdf [file supp_RA120.014723_161359_1_supp_557757_qcsrbb.pdf]

**The NADPH oxidase NOX4 promotes the directed migration of endothelial cells by stabilizing vascular endothelial growth factor receptor 2 protein**

**Kei Miyano<sup>1,6,\*</sup>, Shuichiro Okamoto<sup>1,7,\*</sup>, Akira Yamauchi<sup>1</sup>, Chikage Kawai<sup>1</sup>, Mizuho Kajikawa<sup>2</sup>, Takuya Kiyohara<sup>3</sup>, Minoru Tamura<sup>4</sup>, Masahiko Taura<sup>5</sup> and Futoshi Kuribayashi<sup>1</sup>**

<sup>1</sup>Department of Biochemistry, Kawasaki Medical School, 577 Matsushima Kurashiki, Okayama 701-0192, Japan; <sup>2</sup>Laboratory of Microbiology, Showa Pharmaceutical University, 3-3165 Higashi-Tamagawagakuen, Machida, Tokyo 194-8543, Japan; <sup>3</sup>Department of Cerebrovascular Disease and Neurology, Hakujuji Hospital, 3-2-1 Ishimaru, Nishi-ku, Fukuoka, Fukuoka 819-8511, Japan; <sup>4</sup>Department of Applied Chemistry, Graduate School of Science and Engineering, Ehime University, 3 Bunkyo-cho, Matsuyama, Ehime 790-8577, Japan; <sup>5</sup>Department of Otorhinolaryngology, Faculty of medicine, Fukuoka University, 7-45-1 Nanakuma, Jonan-ku, Fukuoka City, Fukuoka 814-0180, Japan

**Running title:** Stabilization of VEGFR-2 by Nox4

\*These authors contributed equally to this work.

To whom correspondence should be addressed: <sup>6</sup>Kei Miyano, Department of Biochemistry, Kawasaki Medical School, 577 Matsushima Kurashiki, Okayama 701-0192, Japan.

[kei-miyano@med.kawasaki-m.ac.jp](mailto:kei-miyano@med.kawasaki-m.ac.jp);

<sup>7</sup>Shuichiro Okamoto, Department of Biochemistry, Kawasaki Medical School, 577 Matsushima Kurashiki, Okayama 701-0192, Japan. [shuokamoto@med.kawasaki-m.ac.jp](mailto:shuokamoto@med.kawasaki-m.ac.jp)

**Keywords:** NADPH oxidase, Nox4, vascular endothelial growth factor receptor 2 (VEGFR-2), endothelial cell migration, endoplasmic reticulum, angiogenesis, capillary formation, reactive oxygen species (ROS), redox signaling

# Supplemental Figure 1

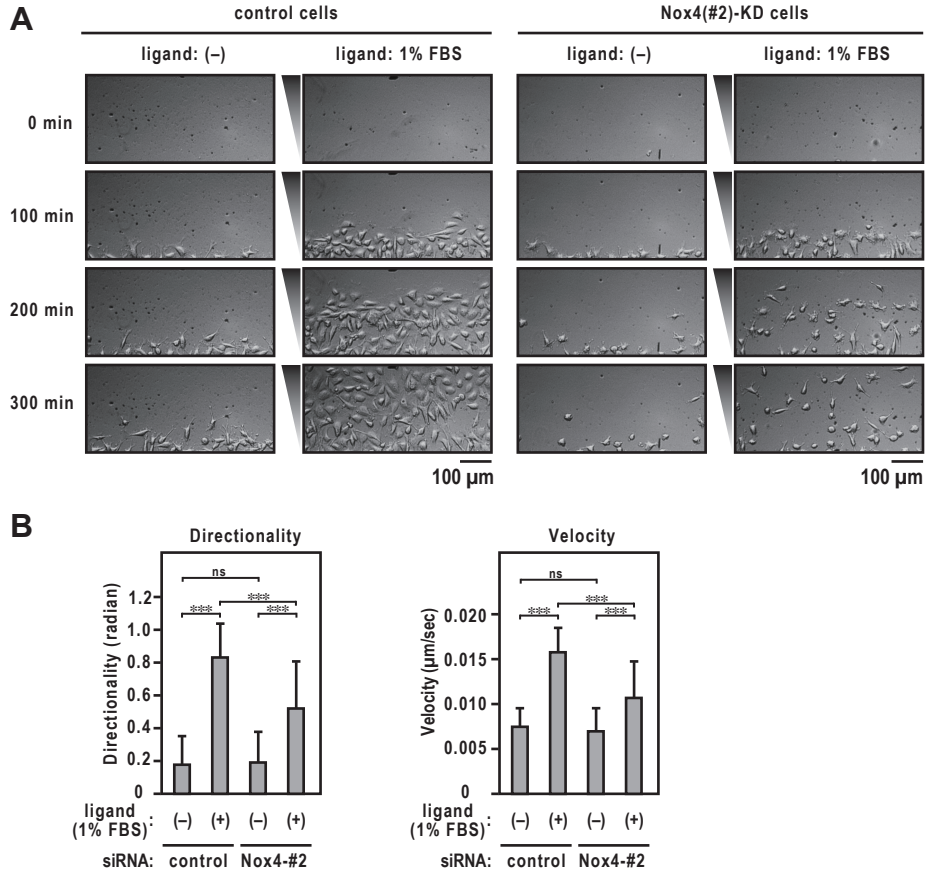

## Supplemental Figure 1. Reduced directed migration of Nox4-knocked down ECs.

(A) Images of ECs migrating toward FBS in TAXIScan channels. The concentration of injected FBS was 1%. The distance between the start line (bottom) and finish line (top) of each channel was 260  $\mu$ m. Scale bar: 100  $\mu$ m.

(B) Statistical analysis, VD plots. Each graph represents the mean  $\pm$  SD of pooled data of migrating cells ( $n \geq 30$ ) from three independent experiments. \*\*\* $p < 0.001$ . Statistical analysis used the Tukey-Kramer test.

The data are representative of results from three independent experiments.

## Supplemental Figure 2

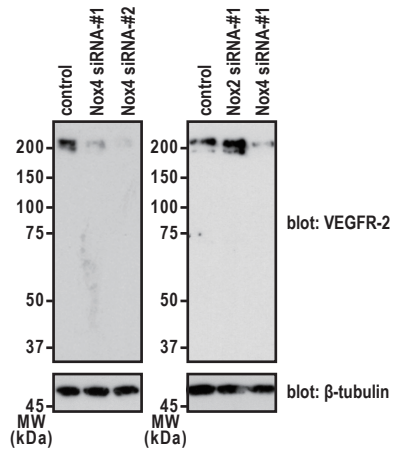

### **Supplemental Figure 2. Maintenance of VEGFR-2 protein levels by Nox4.**

The protein expression levels of Nox4 or Nox2 siRNA-transfected ECs were analyzed by immunoblotting using the indicated antibodies. The positions of the marker proteins are indicated in kDa.

The data are representative of results from three independent experiments.

### Supplemental Figure 3

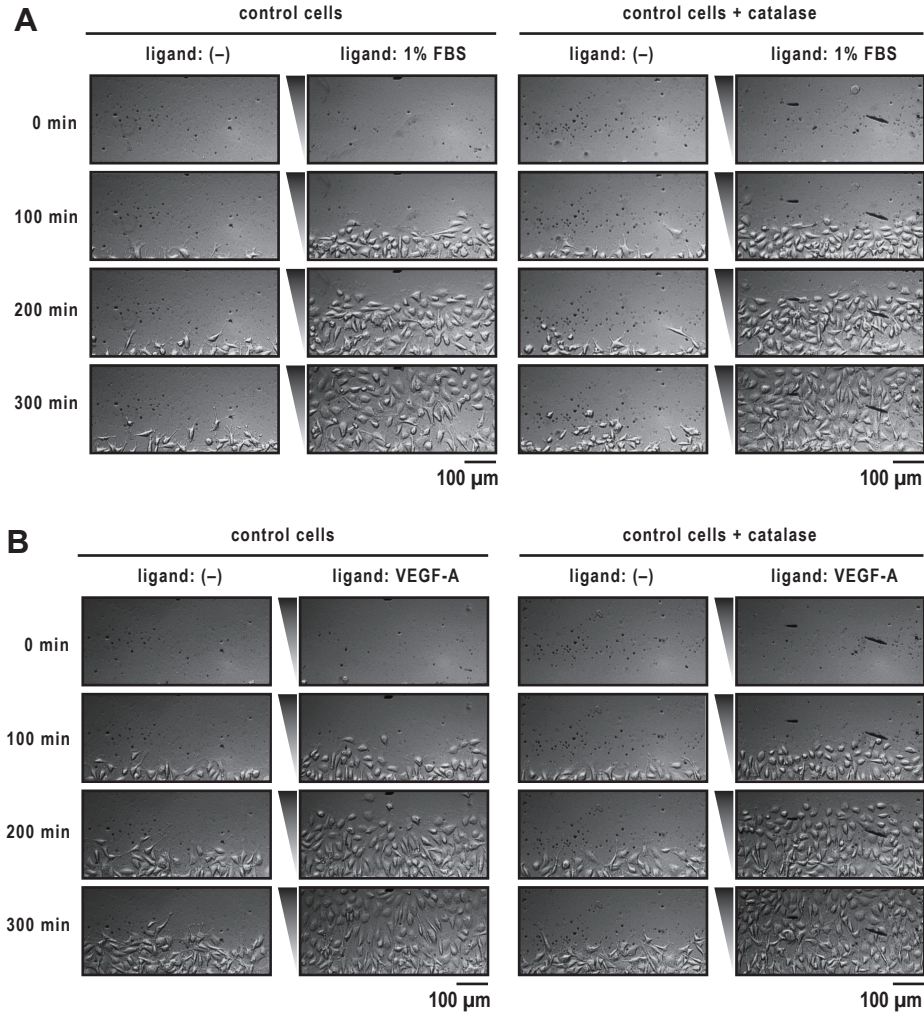

**Supplemental Figure 3. Directed migration of catalase-treated ECs.**

(A and B) Images of ECs migrating toward FBS in TAXIScan channels. The concentration of injected FBS was 1% (A). The concentration of injected VEGF-A was 500 pg/mL (B). The distance between the start line (bottom) and finish line (top) of each channel was 260  $\mu$ m. Scale bar: 100  $\mu$ m.

The data are representative of results from three independent experiments.

## Supplemental Figure 4

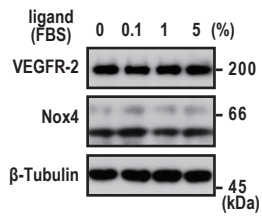

### Supplemental Figure 4. Nox4 and VEGFR-2 protein levels with VEGF-A as ligand for migration assay.

EA.hy926 cells were exposed to each concentration of FBS for 6 h. Protein expression levels were analyzed by immunoblotting using the indicated antibodies. The positions of the marker proteins are indicated in kDa.

The data are representative of results from three independent experiments.
